# Supplementary material for: Hydrolytic vs. Nonhydrolytic Sol-Gel in Preparation of Mixed Oxide Silica–Alumina Catalysts for Esterification
Source: MDPI journal article supplement (doi:10.3390/molecules27082534), 2022-04-14
Supplement: s1 [file s1]

## SUPPLEMENTARY MATERIALS

# Hydrolytic vs. Nonhydrolytic Sol-Gel in Preparation of Mixed Oxide Silica–Alumina Catalysts for Esterification

Atheer Al khudhair <sup>1,2,\*</sup>, Karim Bouchmella <sup>1</sup>, Pierre Hubert Mutin <sup>1</sup>, Vasile Hulea <sup>1</sup>, Olinda Gimello <sup>1</sup>  
<sup>1</sup>  
 and Ahmad Mehdi <sup>1,\*</sup>

<sup>1</sup> ICGM, University Montpellier, CNRS, ENSCM, 34095, Montpellier, France; karim.bouchmella@umontpellier.fr (K.B.); hubert.mutin@umontpellier.fr (P.H.M.); vasile.hulea@umontpellier.fr (V.H.); olinda.gimelle@umontpellier.fr (O.G.)

<sup>2</sup> Department of Chemistry, College of Science, University of Kerbala, Karbala 56001, Iraq

\* Correspondence: atheer.h@uokerbala.edu.iq (A.A.); ahmad.mehdi@umontpellier.fr (A.M.)

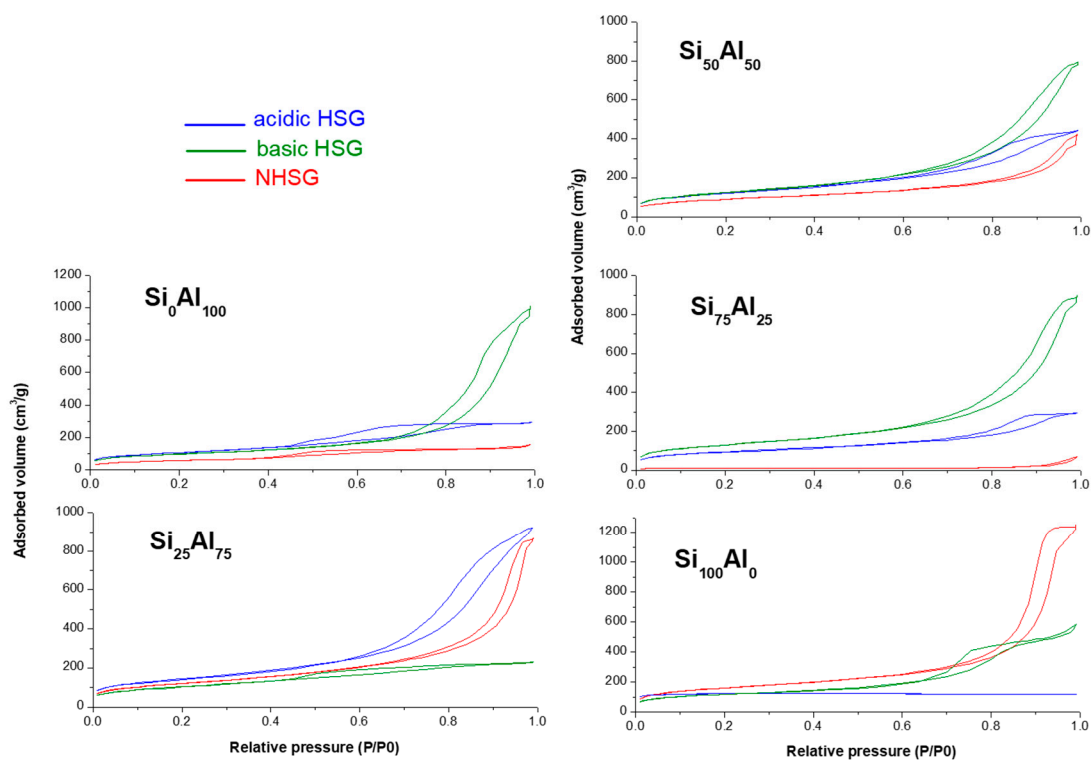

**Figure S1.** N<sub>2</sub> adsorption–desorption isotherms of Si<sub>x</sub>Al<sub>y</sub> samples.

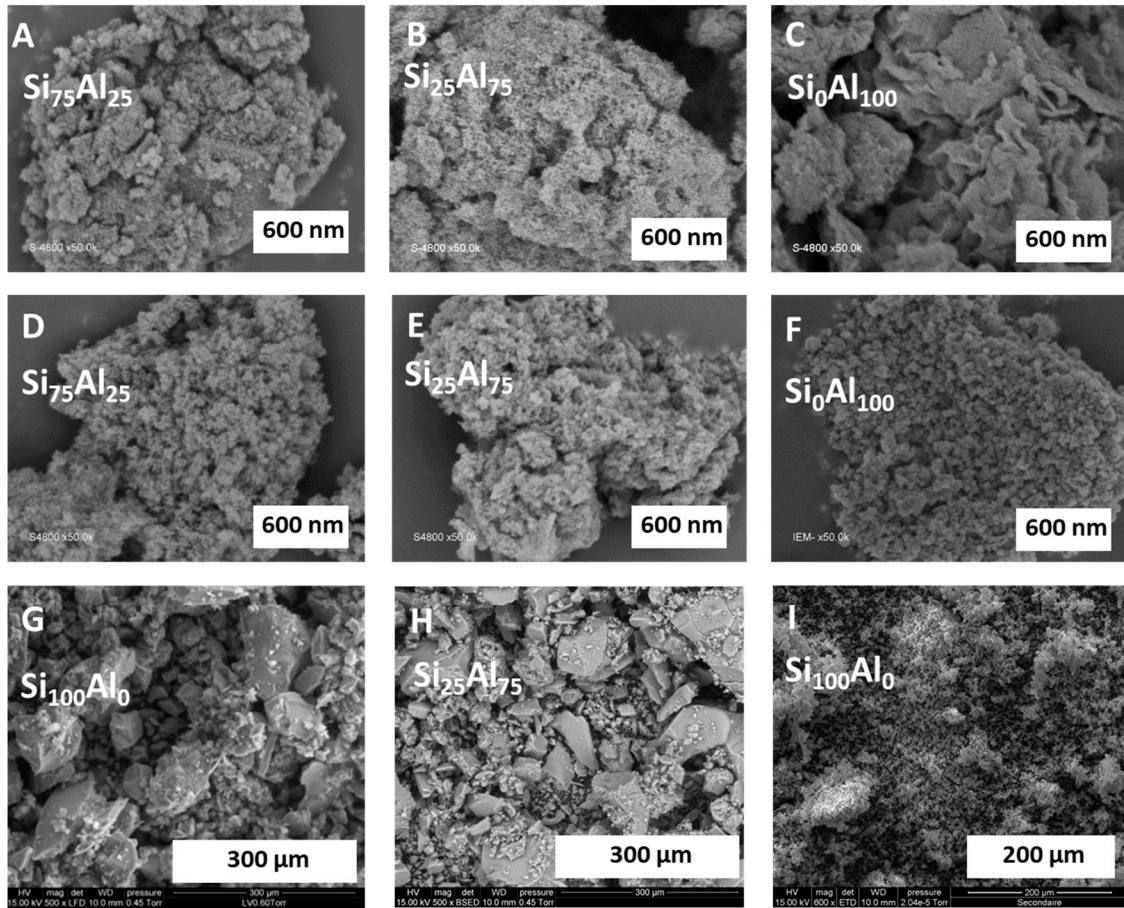

**Figure S2:** SEM images of samples prepared by acidic HSG (A, B, C), basic HSG (D, E, F) and NHS (G, H, I).

**Table S1:** XRD data of  $\gamma\text{-Al}_2\text{O}_3$

| $2\theta$ (deg) | hkl, ICDD: 29-1486, 29-0063, 10-0425 |
|-----------------|--------------------------------------|
| 19.58           | [111]                                |
| 34.83           | [220]                                |
| 37.38           | [311]                                |
| 39.40           | [222]                                |
| 41.26           |                                      |
| 45.73           | [400]                                |
| 60.85           | [511]                                |
| 66.85           | [440]                                |
| 84.87           | [444]                                |
